# Supplementary material for: FASTMAP: Open-Source Flexible Atlas Segmentation Tool for Multi-Area Processing of Biological Images
Source: eNeuro. 2022 Mar 16;9(2):ENEURO.0325-21.2022. doi: 10.1523/ENEURO.0325-21.2022 (PMC8938980; doi:10.1523/ENEURO.0325-21.2022)
Supplement: Extended Data 1 — FASTMAP user guide. Full FASTMAP user guide posted to the GitHub repository, at https://github.com/dterstege/FASTMAP. Download Extended Data 1. Download Extended Data 1, ZIP file. [file enu-eN-OTM-0325-21-s02.zip]

Archive with 8 entries (7 files):
- Extended Data 1/
- __MACOSX/._Extended Data 1
- Extended Data 1/FASTMAP_USER_GUIDE.pdf
- __MACOSX/Extended Data 1/._FASTMAP_USER_GUIDE.pdf
- Extended Data 1/FASTMAP_mac.ijm
- __MACOSX/Extended Data 1/._FASTMAP_mac.ijm
- Extended Data 1/FASTMAP_win.ijm
- __MACOSX/Extended Data 1/._FASTMAP_win.ijm
